# Supplementary material for: Quantifying the Contribution of the Liver to Glucose Homeostasis: A Detailed Kinetic Model of Human Hepatic Glucose Metabolism
Source: PLOS journal article supplement (doi:10.1371/journal.pcbi.1002577), 2012-06-21
Supplement: S16 (10.1371/journal.pcbi.1002577.s016) [file journal.pcbi.1002577.s016]

**Text S5. Overview interconvertible enzymes of human hepatic glucose metabolism.**

| Enzyme | HGP /HGU | Dephosphorylated (dp)                                                                                                                         | Phosphorylated (p)                                                                                                                                  | Phosphorylation Change                                                                                                            |
|--------|----------|-----------------------------------------------------------------------------------------------------------------------------------------------|-----------------------------------------------------------------------------------------------------------------------------------------------------|-----------------------------------------------------------------------------------------------------------------------------------|
| GS     | HGU      | lower affinity for udpglc                                                                                                                     | higher affinity for udpglc                                                                                                                          | <b>Inactivation</b><br>lower affinity for substrate<br>different activation by glc6p                                              |
| GP     | HGP      | lower $V_{max}$<br>no effect glc<br>activation by amp<br>little lower affinity glycogen<br>much lower affinity glc1p<br>much lower affinity p | higher $V_{max}$<br>inactivation by glc<br>no effect amp<br>little higher affinity glycogen<br>much higher affinity glc1p<br>much higher affinity p | <b>Activation</b><br>increased $V_{max}$<br>different activators, inhibitors<br><br>changed affinities substrates<br>and products |
| FB2    | HGP      | lower affinity for fru26bp<br>higher affinity for inactivator fru6p                                                                           | higher affinity for fru26bp<br>lower affinity for inactivator fru6p                                                                                 | <b>Activation</b><br>higher affinity for substrate<br>lower inactivation by fru6p                                                 |
| PFK2   | HGU      | higher affinity for fru6p<br>higher affinity for atp                                                                                          | lower affinity for fru6p<br>lower affinity for atp                                                                                                  | <b>Inactivation</b><br>lower affinity for substrates                                                                              |
| PDH    | HGU      | higher $V_{max}$                                                                                                                              | lower $V_{max}$                                                                                                                                     | <b>Inactivation</b><br>decreased $V_{max}$                                                                                        |
| PK     | HGU      | higher affinity for pep<br>higher affinity for activator fru16p                                                                               | lower affinity for pep<br>lower affinity for activator fru16p                                                                                       | <b>Inactivation</b><br>lower affinity for substrate<br>lower activation by fru16p                                                 |
